# Supplementary material
Source: MDPI journal article supplement (https://www.mdpi.com/1999-4907/11/8/888)
Supplement: s1 [file s1]

# Mission Creek Overstory-Understory Analysis

JD Bakker

7/29/2020

## Introductory Note

This Rmarkdown document contains the analysis and graphs for the manuscript by Rossman et al., titled ‘Long-term effects of fuels treatments, overstory structure, and wildfire on tree regeneration in dry forests of central Washington’.

## Background

The initial FFS study design was a factorial test of thinning and burning. Analysis of this design has been complicated by i) the fact that prescribed fires occurred in 2004 (four units) and 2006 (two units), and differed in burn severity between years, and ii) a wildfire burned four units in 2012.

Prior analyses set 2005 as ‘post1’ for 10 units and 2007 as ‘post1’ for the two units that were burned later. However, this complicates comparisons because it is impossible to distinguish the effects of those later burns from the fact that they were monitored in a year with different growing conditions.

## New Approach

Our approach is to:

- Set 2004 (overstory) or 2005 (understory) as ‘Early’ or ‘post1’ for all plots in all units.
- Set 2015 as ‘Late’ or ‘post2’ for all plots.
- Distinguish burns that occurred before or after the post1 measurement.
- Verify thin and burn treatment codes on the basis of the thinning and/or fire intensity experienced.

### Advantages:

- Cleaner analysis, because post1 more directly reflects treatment rather than interannual variation.
- Allows analysis of all plots in all units (vs. separate analyses of wildfire effects and of treatment effects in non-wildfire units).

### Disadvantages:

- Analyses are not directly comparable with those done previously.

## Details

Structure for analysis of variables:

Pre-treatment sampling:  $> \text{Response} \sim \text{SDI.plot}$

Early sampling:  $> \text{Response} \sim (\text{SDI.plot} + \text{Thin} + \text{Fire.post1})^2$

Late sampling:  $> \text{Response} \sim (\text{SDI.plot} + \text{Thin} + \text{Fire.post1} + \text{Fire.post2})^2$

Rationale:

- SDI.plot is our measure of the overstory in the plot. Name changed to ‘OA’ (Overstory Abundance) in manuscript.
- Thin term (Yes/No) includes effects other than the change in the overstory (e.g., accumulation of fine fuels)
- Fire.post1 (Yes/No) reflects whether plots burned before the Early (post1) remeasurement.
- Fire.post2 (Yes/No) reflects whether plots burned between the Early (post1) and Late (post2) remeasurements.
- Thin and Fire terms in chronological order.
- All two-way interactions possible.
- Not testing more complex interactions as they would be too complicated to explain and we do not have enough plots to do so robustly.

Use GLM or LM depending on distribution of data. Not using mixed models because plots are assigned to treatments based on the actual intensity of Thin or Fire, and because of singularities during model fit.

## Thinning intensity

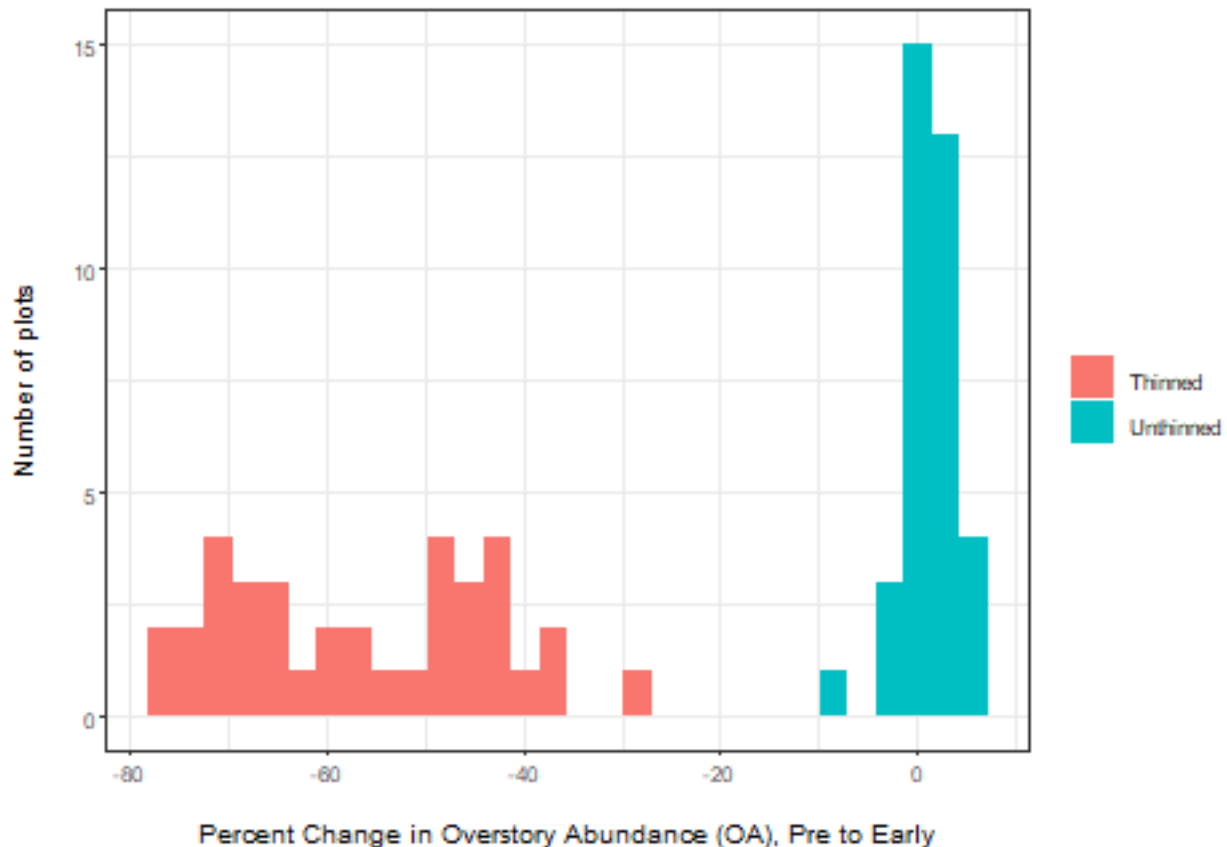

## Burn severity

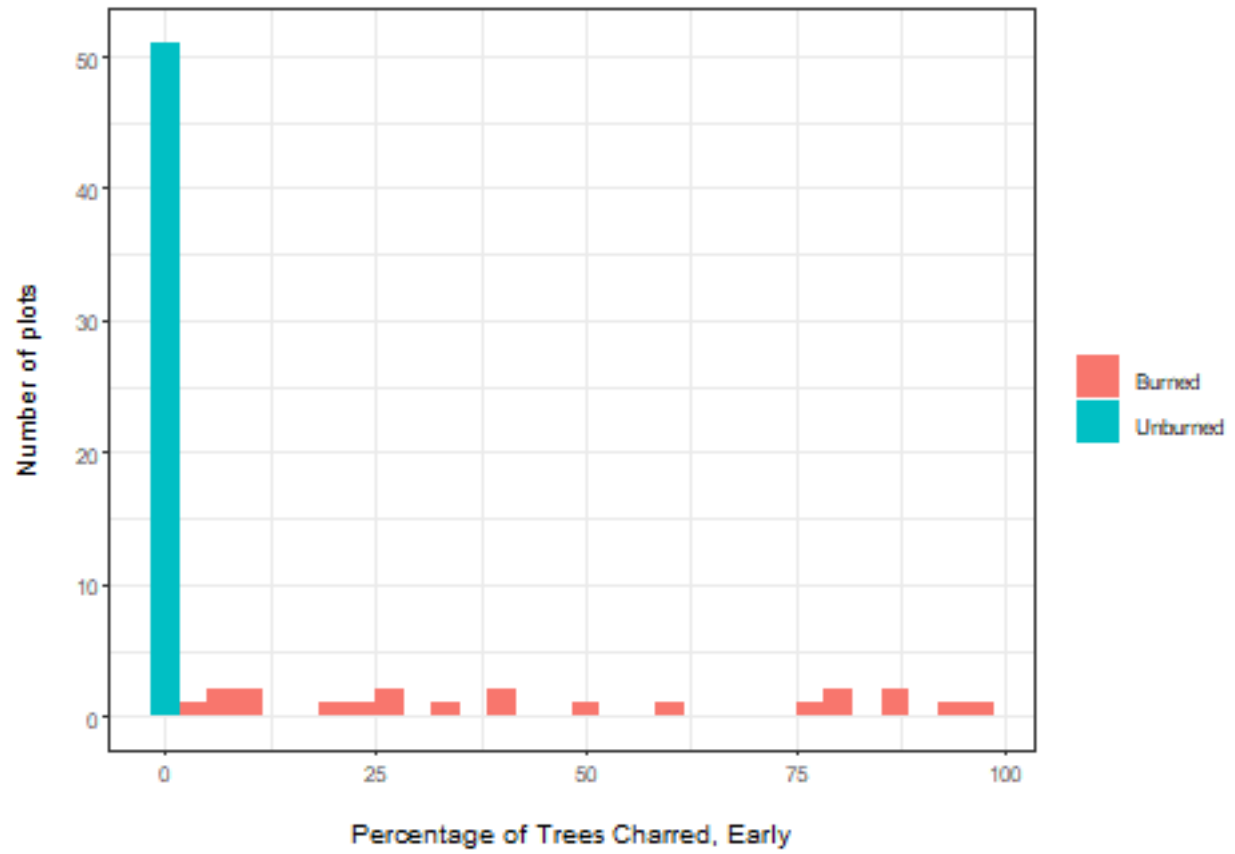

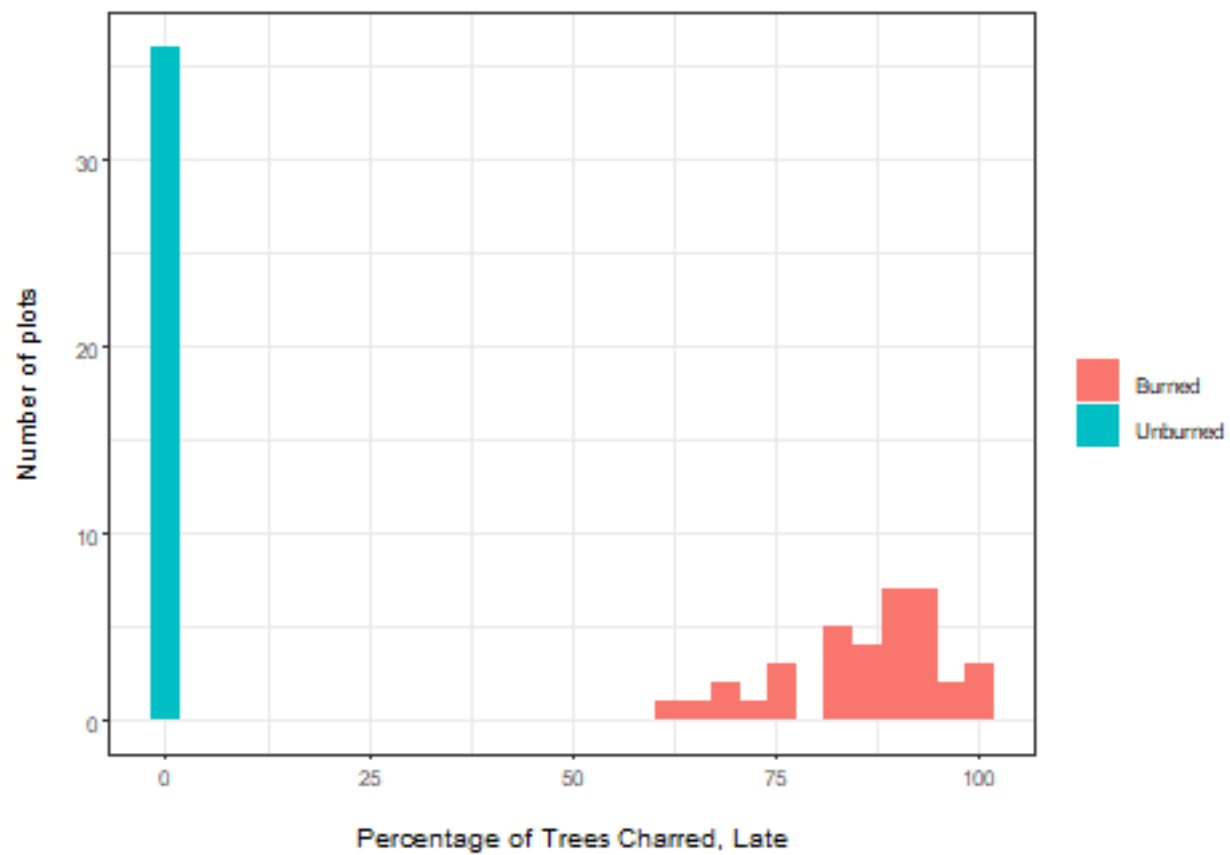

Relate overstory structure metrics (overstory abundance, basal area, density)

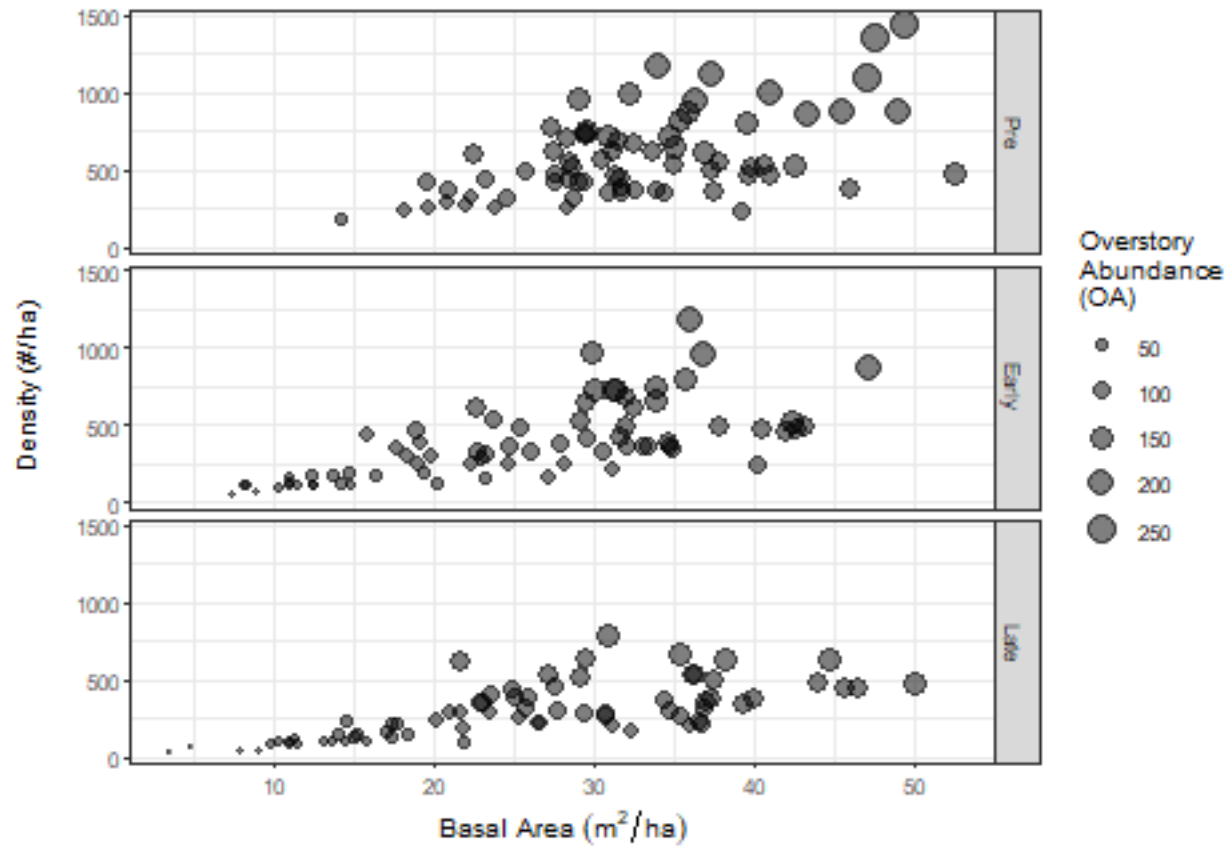

## Overstory Dynamics

Using SDI.plot as our index of the overstory.

**Ingrowth** Compared poisson and negative binomial models; negative binomial fit much better.

```
## Warning in anova.negbin(Ingrowth.res.nb <- glm.nb(Ingrowth ~ (SDI.plot_post1 + :
## tests made without re-estimating 'theta'
```

```
## Analysis of Deviance Table
```

```
##
```

```
## Model: Negative Binomial(0.5118), link: log
```

```
##
```

```
## Response: Ingrowth
```

```
##
```

```
## Terms added sequentially (first to last)
```

```
##
```

```
##
```

```
##
```

```
Df Deviance Resid. Df Resid. Dev Pr(>Chi)
```

```
## NULL 71 73.847
## SDI.plot_post1 1 0.1256 70 73.721 0.72299
## Thin.actual 1 5.5595 69 68.161 0.01838 *
## Fire.actual.post1 1 2.0595 68 66.102 0.15126
## Fire.actual.post2 1 3.3597 67 62.742 0.06681 .
## SDI.plot_post1:Thin.actual 1 1.8927 66 60.849 0.16890
## SDI.plot_post1:Fire.actual.post1 1 1.1678 65 59.682 0.27986
## SDI.plot_post1:Fire.actual.post2 1 0.1447 64 59.537 0.70364
## Thin.actual:Fire.actual.post1 1 4.0842 63 55.453 0.04329 *
## Thin.actual:Fire.actual.post2 1 1.1258 62 54.327 0.28868
## Fire.actual.post1:Fire.actual.post2 1 0.4248 61 53.902 0.51455
## ---
## Signif. codes:  0 '***' 0.001 '**' 0.01 '*' 0.05 '.' 0.1 ' ' 1
```

```
## [1] 0.7285256
```

Thin, Thin:EarlyFire; LateFire marginal

**Overstory Mortality** Mortality calculated as density change minus ingrowth. Expressed as positive value so can be analyzed using GLM. Compared poisson and negative binomial models; negative binomial fit much better.

```
## Warning in anova.negbin(Mortality.res.nb <- glm.nb(Mortality ~ (SDI.plot_post1
## + : tests made without re-estimating 'theta'
```

```
## Analysis of Deviance Table
```

```
##
```

```
## Model: Negative Binomial(2.1195), link: log
```

```
##
```

```
## Response: Mortality
```

```
##
```

```
## Terms added sequentially (first to last)
```

```
##
```

```
##
```

|                                        | Df | Deviance | Resid. | Df | Resid. Dev | Pr(>Chi)  |
|----------------------------------------|----|----------|--------|----|------------|-----------|
| ## NULL                                |    |          |        | 71 | 209.694    |           |
| ## SDI.plot_post1                      | 1  | 76.334   |        | 70 | 133.360    | < 2.2e-16 |
| ## Thin.actual                         | 1  | 0.549    |        | 69 | 132.811    | 0.458732  |
| ## Fire.actual.post1                   | 1  | 2.470    |        | 68 | 130.341    | 0.116011  |
| ## Fire.actual.post2                   | 1  | 33.156   |        | 67 | 97.185     | 8.506e-09 |
| ## SDI.plot_post1:Thin.actual          | 1  | 1.375    |        | 66 | 95.810     | 0.241033  |
| ## SDI.plot_post1:Fire.actual.post1    | 1  | 9.990    |        | 65 | 85.820     | 0.001574  |
| ## SDI.plot_post1:Fire.actual.post2    | 1  | 3.265    |        | 64 | 82.555     | 0.070763  |
| ## Thin.actual:Fire.actual.post1       | 1  | 1.019    |        | 63 | 81.536     | 0.312777  |
| ## Thin.actual:Fire.actual.post2       | 1  | 2.947    |        | 62 | 78.589     | 0.086025  |
| ## Fire.actual.post1:Fire.actual.post2 | 1  | 2.318    |        | 61 | 76.270     | 0.127866  |

```
##
```

```
## NULL
```

```
## SDI.plot_post1 ***
```

```
## Thin.actual
```

```
## Fire.actual.post1
```

```
## Fire.actual.post2 ***
```

```
## SDI.plot_post1:Thin.actual
## SDI.plot_post1:Fire.actual.post1 **
## SDI.plot_post1:Fire.actual.post2 .
## Thin.actual:Fire.actual.post1
## Thin.actual:Fire.actual.post2 .
## Fire.actual.post1:Fire.actual.post2
## ---
## Signif. codes:  0 '***' 0.001 '**' 0.01 '*' 0.05 '.' 0.1 ' ' 1

## [1] 0.08999901
```

SDI.plot, LateFire, SDI.plot:LateFire

### Overstory Growth (Basal Area Increment)

```
## Analysis of Variance Table
##
## Response: BAI
##
##          Df Sum Sq Mean Sq F value    Pr(>F)
## SDI.plot_post1      1  1.2179  1.21787    5.9724 0.017439 *
## Thin.actual          1  0.2075  0.20752    1.0177 0.317054
## Fire.actual.post1    1  0.8553  0.85525    4.1941 0.044875 *
## Fire.actual.post2    1  1.8433  1.84326    9.0393 0.003833 **
## SDI.plot_post1:Thin.actual      1  0.6527  0.65266    3.2006 0.078574 .
## SDI.plot_post1:Fire.actual.post1      1  1.7472  1.74723    8.5684 0.004801 **
## SDI.plot_post1:Fire.actual.post2      1  0.0867  0.08667    0.4250 0.516885
## Thin.actual:Fire.actual.post1      1  0.3177  0.31766    1.5578 0.216757
## Thin.actual:Fire.actual.post2      1  0.0702  0.07023    0.3444 0.559456
## Fire.actual.post1:Fire.actual.post2  1  0.0787  0.07872    0.3861 0.536691
## Residuals          61 12.4389  0.20392
## ---
## Signif. codes:  0 '***' 0.001 '**' 0.01 '*' 0.05 '.' 0.1 ' ' 1
```

SDI.plot, EarlyFire, LateFire; SDI.plot:EarlyFire; (SDI.plot:Thin marginal)

---

### Regeneration Frequency (2015)

Graph regeneration frequency against regeneration density

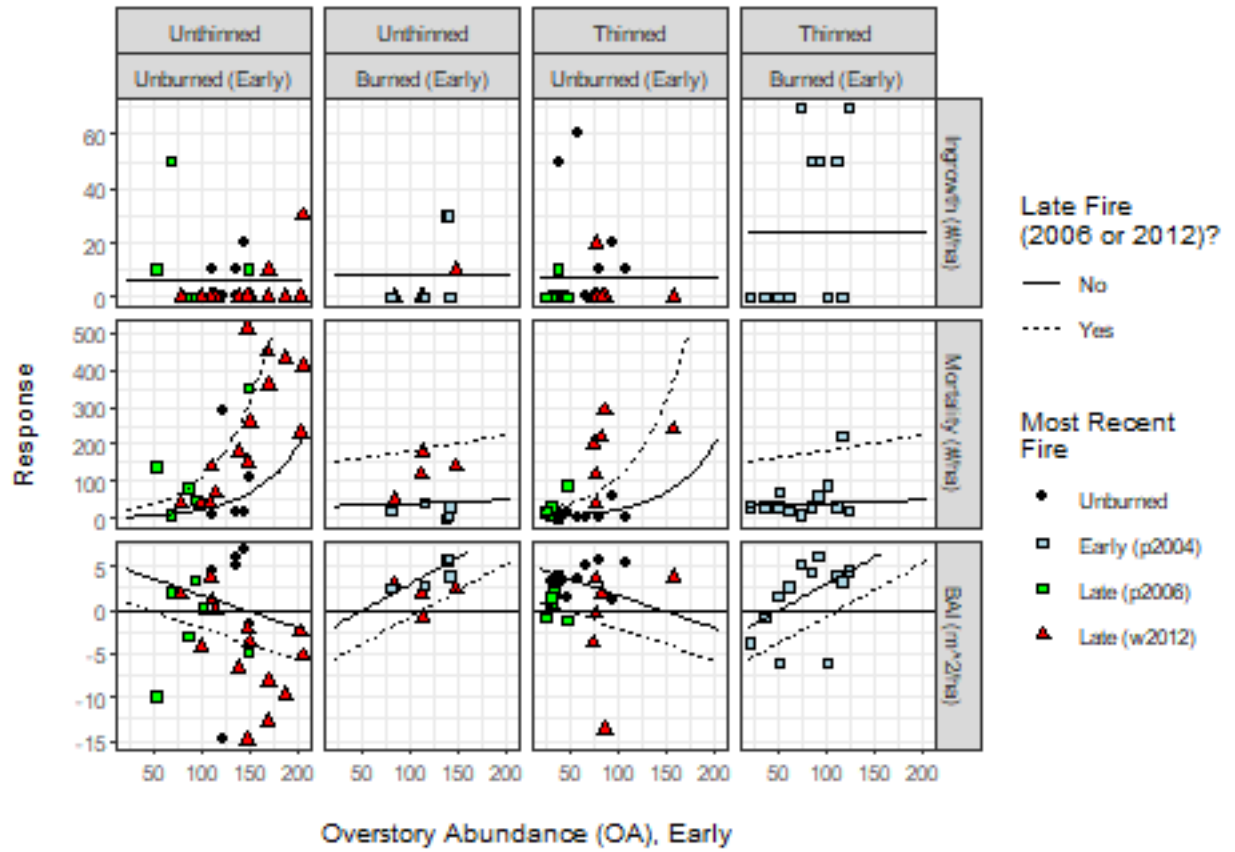

Figure 1: Overstory dynamics between Early and Late post-treatment measurements. Note difference in scale of y-axis among rows of panels.



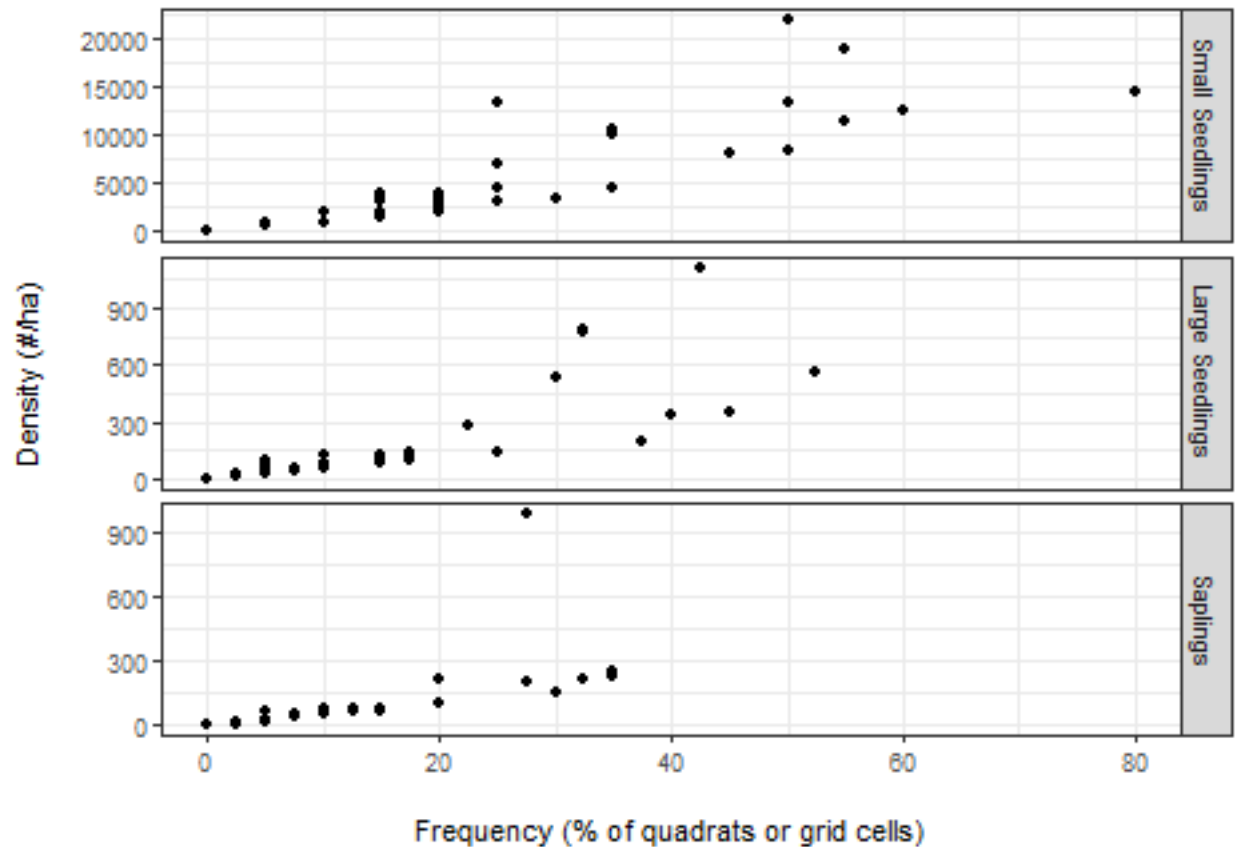

All data from 2015.

Frequency is number of microplots that contained small seedlings, and number of grid cells that contained large seedlings or saplings - need to keep this in mind when comparing between regen classes..

Analyzed via GLM with negative binomial distribution.

```
anova(SmallSeedling.N.res <- glm.nb(SmallSeedling.N ~ (SDI.plot_post2 + Thin.actual + Fire.actual.post1
                                     data = master, maxit = 100),
      test = "Chisq")
```

## Small Seedlings

```
## Analysis of Deviance Table
##
## Model: Negative Binomial(2.5371), link: log
##
## Response: SmallSeedling.N
##
## Terms added sequentially (first to last)
##
##
## Df Deviance Resid. Df Resid. Dev Pr(>Chi)
```

```
## NULL 71 129.436
## SDI.plot_post2 1 0.544 70 128.893 0.460930
## Thin.actual 1 4.015 69 124.878 0.045106
## Fire.actual.post1 1 7.693 68 117.185 0.005544
## Fire.actual.post2 1 32.875 67 84.310 9.828e-09
## SDI.plot_post2:Thin.actual 1 1.042 66 83.269 0.307438
## SDI.plot_post2:Fire.actual.post1 1 0.085 65 83.183 0.770061
## SDI.plot_post2:Fire.actual.post2 1 2.185 64 80.998 0.139357
## Thin.actual:Fire.actual.post1 1 0.175 63 80.823 0.675683
## Thin.actual:Fire.actual.post2 1 0.063 62 80.760 0.801827
## Fire.actual.post1:Fire.actual.post2 1 3.813 61 76.947 0.050843
##
## NULL
## SDI.plot_post2
## Thin.actual *
## Fire.actual.post1 **
## Fire.actual.post2 ***
## SDI.plot_post2:Thin.actual
## SDI.plot_post2:Fire.actual.post1
## SDI.plot_post2:Fire.actual.post2
## Thin.actual:Fire.actual.post1
## Thin.actual:Fire.actual.post2
## Fire.actual.post1:Fire.actual.post2 .
## ---
## Signif. codes:  0 '***' 0.001 '**' 0.01 '*' 0.05 '.' 0.1 ' ' 1
```

Thin, Fire.actual.post1, Fire.actual.post2 (Fire.actual.post1:Fire.actual.post2 marginal)

```
anova(LargeSeedling.N.res <- glm.nb(LargeSeedling.N ~ (SDI.plot_post2 + Thin.actual + Fire.actual.post1
                                     data = master, maxit = 100),
      test = "Chisq")
```

## Large Seedlings

```
## Analysis of Deviance Table
##
## Model: Negative Binomial(0.7468), link: log
##
## Response: LargeSeedling.N
##
## Terms added sequentially (first to last)
##
##
## Df Deviance Resid. Df Resid. Dev Pr(>Chi)
## NULL 71 111.952
## SDI.plot_post2 1 2.1536 70 109.798 0.142240
## Thin.actual 1 7.6317 69 102.167 0.005735
## Fire.actual.post1 1 1.9674 68 100.199 0.160724
## Fire.actual.post2 1 8.0143 67 92.185 0.004641
## SDI.plot_post2:Thin.actual 1 16.6486 66 75.536 4.498e-05
## SDI.plot_post2:Fire.actual.post1 1 0.3540 65 75.182 0.551841
```

```
## SDI.plot_post2:Fire.actual.post2      1   5.5807      64    69.602  0.018160
## Thin.actual:Fire.actual.post1         1   0.0082      63    69.593  0.927953
## Thin.actual:Fire.actual.post2         1   0.3267      62    69.267  0.567620
## Fire.actual.post1:Fire.actual.post2    1   0.6816      61    68.585  0.409036
##
## NULL
## SDI.plot_post2
## Thin.actual                        **
## Fire.actual.post1
## Fire.actual.post2                  **
## SDI.plot_post2:Thin.actual          ***
## SDI.plot_post2:Fire.actual.post1
## SDI.plot_post2:Fire.actual.post2    *
## Thin.actual:Fire.actual.post1
## Thin.actual:Fire.actual.post2
## Fire.actual.post1:Fire.actual.post2
## ---
## Signif. codes:  0 '***' 0.001 '**' 0.01 '*' 0.05 '.' 0.1 ' ' 1
```

Thin.actual, Fire.actual.post2, SDI.plot\_post2:Thin.actual, SDI.plot\_post2:Fire.actual.post2

```
anova(Sapling.N.res <- glm.nb(Sapling.N ~ (SDI.plot_post2 + Thin.actual + Fire.actual.post1 + Fire.actual.post2),
                              data = master, maxit = 100),
      test = "Chisq")
```

## Saplings

```
## Analysis of Deviance Table
##
## Model: Negative Binomial(0.6278), link: log
##
## Response: Sapling.N
##
## Terms added sequentially (first to last)
##
##
##              Df Deviance Resid. Df Resid. Dev  Pr(>Chi)
## NULL                                71    105.626
## SDI.plot_post2          1  15.7589      70    89.867 7.195e-05
## Thin.actual             1   7.5246      69    82.343 0.006086
## Fire.actual.post1       1   0.0571      68    82.286 0.811066
## Fire.actual.post2       1   9.4900      67    72.796 0.002066
## SDI.plot_post2:Thin.actual 1   7.9010      66    64.895 0.004941
## SDI.plot_post2:Fire.actual.post1 1  1.7914      65    63.103 0.180760
## SDI.plot_post2:Fire.actual.post2 1  0.1118      64    62.992 0.738154
## Thin.actual:Fire.actual.post1 1  0.0033      63    62.988 0.954061
## Thin.actual:Fire.actual.post2 1  1.7065      62    61.282 0.191436
## Fire.actual.post1:Fire.actual.post2 1  0.7999      61    60.482 0.371135
##
## NULL
## SDI.plot_post2                        ***
```

```

## Thin.actual                **
## Fire.actual.post1
## Fire.actual.post2         **
## SDI.plot_post2:Thin.actual **
## SDI.plot_post2:Fire.actual.post1
## SDI.plot_post2:Fire.actual.post2
## Thin.actual:Fire.actual.post1
## Thin.actual:Fire.actual.post2
## Fire.actual.post1:Fire.actual.post2
## ---
## Signif. codes:  0 '***' 0.001 '**' 0.01 '*' 0.05 '.' 0.1 ' ' 1

```

SDI, Thin, Fire.actual.post2, SDI:Thin

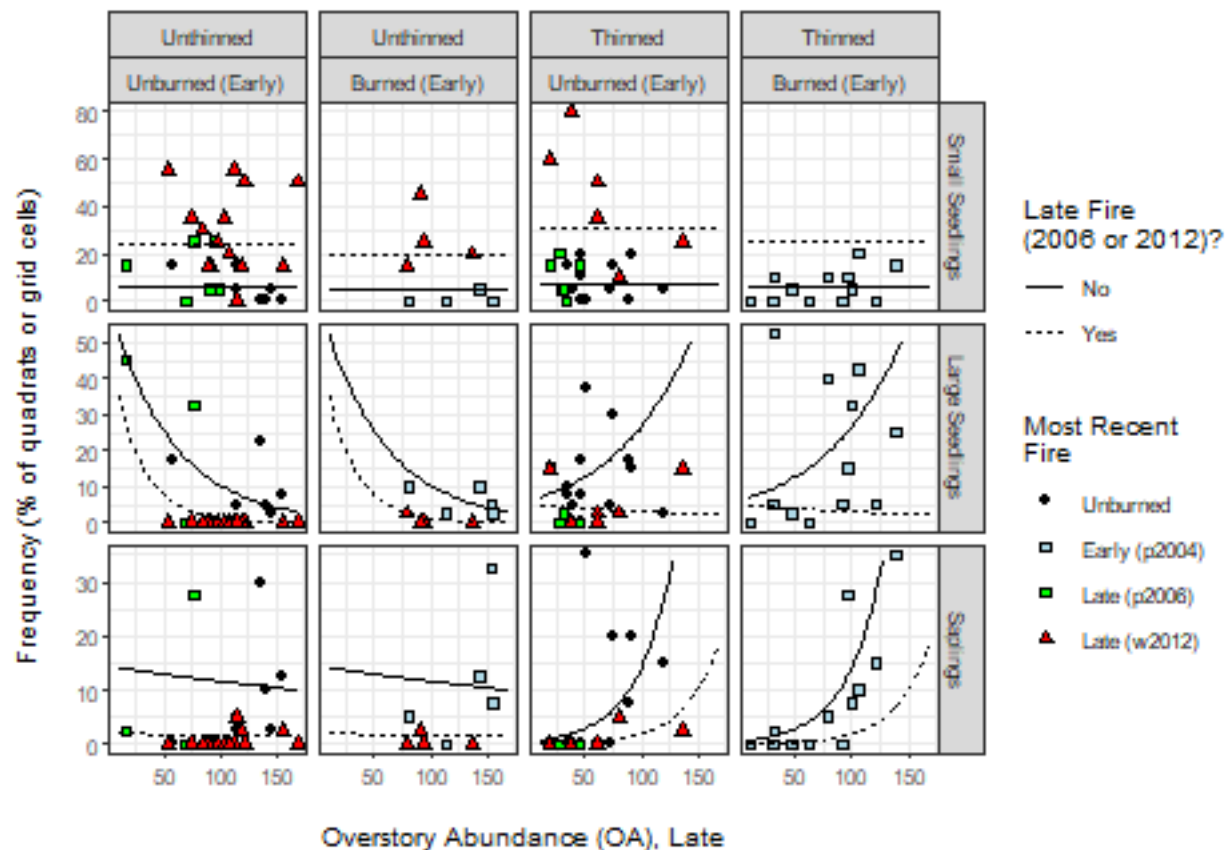

## Colonization and Persistence

*Colonization* = number of microplots in which conifer seedlings were absent at start but present at end of interval divided by number of microplots in which conifer seedlings remained absent at end of interval.

*Persistence* = number of microplots in which conifer seedlings were present at start and end of interval divided by number of microplots in which conifer seedlings were present at start of interval. Opposite of extinction.

Analyzed using SDI at start of interval.

```
anova(pre.CONIF.N.res <- glm.nb(pre.Present ~ SDI.plot_pre,
                                data = master),
      test = "Chisq")
```

## Pre

```
## Analysis of Deviance Table
##
## Model: Negative Binomial(0.7161), link: log
##
## Response: pre.Present
##
## Terms added sequentially (first to last)
##
##
##              Df Deviance Resid. Df Resid. Dev Pr(>Chi)
## NULL                                71      73.759
## SDI.plot_pre  1    5.0284      70      68.730 0.02493 *
## ---
## Signif. codes:  0 '***' 0.001 '**' 0.01 '*' 0.05 '.' 0.1 ' ' 1
```

## SDI

```
anova(post1.CONIF.N.res <- glm.nb(post1.Present ~ (SDI.plot_post1 + Thin.actual + Fire.actual.post1)^2,
                                data = master),
      test = "Chisq")
```

## Post1

```
## Warning in anova.negbin(post1.CONIF.N.res <- glm.nb(post1.Present ~
## (SDI.plot_post1 + : tests made without re-estimating 'theta'

## Analysis of Deviance Table
##
## Model: Negative Binomial(15.2644), link: log
##
## Response: post1.Present
##
## Terms added sequentially (first to last)
##
##
##              Df Deviance Resid. Df Resid. Dev Pr(>Chi)
## NULL                                71      112.652
## SDI.plot_post1  1    1.4519      70      111.200 0.22823
## Thin.actual      1    1.5585      69      109.641 0.21189
## Fire.actual.post1 1    4.6968      68      104.945 0.03022 *
## SDI.plot_post1:Thin.actual 1 16.6762      67      88.268 4.433e-05 ***
## SDI.plot_post1:Fire.actual.post1 1 1.2130      66      87.055 0.27074
```

```
## Thin.actual:Fire.actual.post1      1      1.0363      65      86.019      0.30869
## ---
## Signif. codes:  0 '***' 0.001 '**' 0.01 '*' 0.05 '.' 0.1 ' ' 1
```

Fire, SDI:Thin

```
anova(post2.CONIF.N.res <- glm.nb(post2.Present ~ (SDI.plot_post2 + Thin.actual + Fire.actual.post1 + F
                                data = master),
      test = "Chisq")
```

## Post2

```
## Analysis of Deviance Table
##
## Model: Negative Binomial(3.5236), link: log
##
## Response: post2.Present
##
## Terms added sequentially (first to last)
##
##
##              Df Deviance Resid. Df Resid. Dev Pr(>Chi)
## NULL                                71      125.787
## SDI.plot_post2      1      0.5256      70      125.262  0.46846
## Thin.actual          1      3.5173      69      121.744  0.06073
## Fire.actual.post1     1      6.0557      68      115.689  0.01386
## Fire.actual.post2     1     26.1925      67       89.496 3.09e-07
## SDI.plot_post2:Thin.actual      1      2.3350      66       87.161  0.12649
## SDI.plot_post2:Fire.actual.post1  1      0.1746      65       86.987  0.67610
## SDI.plot_post2:Fire.actual.post2  1      2.6357      64       84.351  0.10449
## Thin.actual:Fire.actual.post1     1      0.4805      63       83.870  0.48821
## Thin.actual:Fire.actual.post2     1      0.4206      62       83.450  0.51666
## Fire.actual.post1:Fire.actual.post2  1      4.9652      61       78.485  0.02586
##
## NULL
## SDI.plot_post2
## Thin.actual          .
## Fire.actual.post1     *
## Fire.actual.post2     ***
## SDI.plot_post2:Thin.actual
## SDI.plot_post2:Fire.actual.post1
## SDI.plot_post2:Fire.actual.post2
## Thin.actual:Fire.actual.post1
## Thin.actual:Fire.actual.post2
## Fire.actual.post1:Fire.actual.post2 *
## ---
## Signif. codes:  0 '***' 0.001 '**' 0.01 '*' 0.05 '.' 0.1 ' ' 1
```

Fire.actual.post1, Fire.actual.post2, Fire.actual.post1:Fire.actual.post2 (Thin marginal)

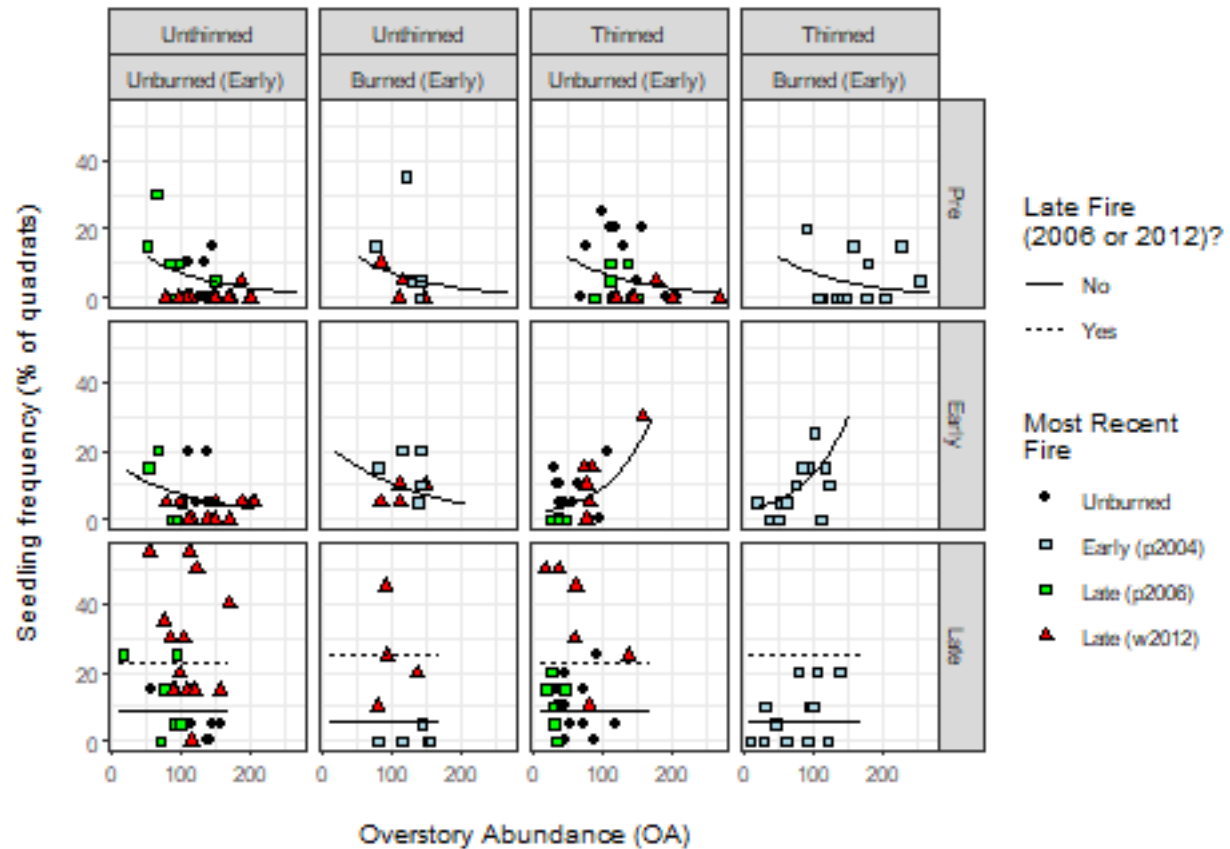

## Seedling Transitions

Pre to Early Colonization

```
## Warning in sqrt(1/i): NaNs produced
```

```
## Warning in sqrt(1/i): NaNs produced
```

```
## Warning in anova.negbin(pre.CONIF.col.res <- glm.nb(Colonization ~ (SDI.plot + :
## tests made without re-estimating 'theta'
```

```
## Analysis of Deviance Table
```

```
##
```

```
## Model: Negative Binomial(6.670614e+12), link: log
```

```
##
```

```
## Response: Colonization
```

```
##
```

```
## Terms added sequentially (first to last)
```

```
##
```

```
##
```

```
##
```

|                | Df | Deviance | Resid. Df | Resid. Dev | Pr(>Chi)     |
|----------------|----|----------|-----------|------------|--------------|
| ## NULL        |    |          | 71        | 115.407    |              |
| ## SDI.plot    | 1  | 10.4429  | 70        | 104.965    | 0.0012312 ** |
| ## Thin.actual | 1  | 0.6419   | 69        | 104.323    | 0.4230064    |

```
## NULL
```

```
## SDI.plot
```

```
## Thin.actual
```

```
## Fire.actual.post1          1    7.2093          68    97.113 0.0072526 **
## SDI.plot:Thin.actual       1   12.2542          67    84.859 0.0004642 ***
## SDI.plot:Fire.actual.post1  1    2.2304          66    82.629 0.1353160
## Thin.actual:Fire.actual.post1 1    1.4564          65    81.172 0.2275040
## ---
## Signif. codes:  0 '***' 0.001 '**' 0.01 '*' 0.05 '.' 0.1 ' ' 1
```

SDI, Fire.actual.post1, SDI:Thin

Persistence

```
## Warning in theta.ml(Y, mu, sum(w), w, limit = control$maxit, trace =
## control$trace > : iteration limit reached
```

```
## Warning in sqrt(1/i): NaNs produced
```

```
## Warning in theta.ml(Y, mu, sum(w), w, limit = control$maxit, trace =
## control$trace > : iteration limit reached
```

```
## Warning in sqrt(1/i): NaNs produced
```

```
## Warning in anova.negbin(pre.CONIF.per.res <- glm.nb(Persistence ~ (SDI.plot + :
## tests made without re-estimating 'theta'
```

```
## Analysis of Deviance Table
```

```
##
```

```
## Model: Negative Binomial(3795030167), link: log
```

```
##
```

```
## Response: Persistence
```

```
##
```

```
## Terms added sequentially (first to last)
```

```
##
```

```
##
```

|                                  | Df | Deviance | Resid. | Df | Resid. | Dev    | Pr(>Chi) |
|----------------------------------|----|----------|--------|----|--------|--------|----------|
| ## NULL                          |    |          |        | 31 |        | 30.766 |          |
| ## SDI.plot                      | 1  | 0.34393  |        | 30 |        | 30.422 | 0.5576   |
| ## Thin.actual                   | 1  | 0.03733  |        | 29 |        | 30.384 | 0.8468   |
| ## Fire.actual.post1             | 1  | 1.51501  |        | 28 |        | 28.869 | 0.2184   |
| ## SDI.plot:Thin.actual          | 1  | 2.52569  |        | 27 |        | 26.344 | 0.1120   |
| ## SDI.plot:Fire.actual.post1    | 1  | 0.57997  |        | 26 |        | 25.764 | 0.4463   |
| ## Thin.actual:Fire.actual.post1 | 1  | 0.04443  |        | 25 |        | 25.719 | 0.8331   |

iteration limit reached

Early to Late Colonization

```
## Warning in anova.negbin(post1.CONIF.col.res <- glm.nb(Colonization ~ (SDI.plot
## + : tests made without re-estimating 'theta'
```



```

## Analysis of Deviance Table
##
## Model: Negative Binomial(4.5007), link: log
##
## Response: Colonization
##
## Terms added sequentially (first to last)
##
##
##              Df Deviance Resid. Df Resid. Dev  Pr(>Chi)
## NULL                                71    132.803
## SDI.plot                1    6.2209         70    126.582 0.0126248
## Thin.actual             1    0.0002         69    126.582 0.9895094
## Fire.actual.post1       1   11.6211         68    114.960 0.0006521
## Fire.actual.post2       1   29.7930         67     85.167 4.807e-08
## SDI.plot:Thin.actual    1    2.6046         66     82.563 0.1065530
## SDI.plot:Fire.actual.post1 1    0.7468         65     81.816 0.3874991
## SDI.plot:Fire.actual.post2 1    3.5781         64     78.238 0.0585461
## Thin.actual:Fire.actual.post1 1    0.4269         63     77.811 0.5134959
## Thin.actual:Fire.actual.post2 1    1.1893         62     76.622 0.2754630
## Fire.actual.post1:Fire.actual.post2 1    6.8083         61     69.813 0.0090736
##
## NULL
## SDI.plot                *
## Thin.actual
## Fire.actual.post1       ***
## Fire.actual.post2       ***
## SDI.plot:Thin.actual
## SDI.plot:Fire.actual.post1
## SDI.plot:Fire.actual.post2 .
## Thin.actual:Fire.actual.post1
## Thin.actual:Fire.actual.post2
## Fire.actual.post1:Fire.actual.post2 **
## ---
## Signif. codes:  0 '***' 0.001 '**' 0.01 '*' 0.05 '.' 0.1 ' ' 1

SDI, Fire.actual.post1, Fire.actual.post2, Fire.actual.post1:Fire.actual.post2; (SDI:Fire.actual.post2
marginal)

Persistence

## Warning in theta.ml(Y, mu, sum(w), w, limit = control$maxit, trace =
## control$trace > : iteration limit reached

## Warning in sqrt(1/i): NaNs produced

## Warning in theta.ml(Y, mu, sum(w), w, limit = control$maxit, trace =
## control$trace > : iteration limit reached

## Warning in sqrt(1/i): NaNs produced

## Warning in anova.negbin(post1.CONIF.per.res <- glm.nb(Persistence ~ (SDI.plot
## + : tests made without re-estimating 'theta'

```

```
## Analysis of Deviance Table
##
## Model: Negative Binomial(7.652227e+15), link: log
##
## Response: Persistence
##
## Terms added sequentially (first to last)
##
##
##              Df Deviance Resid. Df Resid. Dev  Pr(>Chi)
## NULL                                46    24.8135
## SDI.plot                1  16.1582      45     8.6553 5.827e-05
## Thin.actual             1   0.0000      44    11.4311 1.000000
## Fire.actual.post1       1   0.0000      43    14.8149 1.000000
## Fire.actual.post2       1   6.2414      42     8.5735 0.012480
## SDI.plot:Thin.actual    1   3.5514      41     5.0221 0.059494
## SDI.plot:Fire.actual.post1 1   0.0000      40    13.0416 1.000000
## SDI.plot:Fire.actual.post2 1   0.2383      39    12.8033 0.625455
## Thin.actual:Fire.actual.post1 1   7.8385      38     4.9648 0.005115
## Thin.actual:Fire.actual.post2 1   0.0000      37     6.5216 1.000000
## Fire.actual.post1:Fire.actual.post2 1   0.0000      36     7.6649 1.000000
##
## NULL
## SDI.plot                ***
## Thin.actual
## Fire.actual.post1
## Fire.actual.post2       *
## SDI.plot:Thin.actual    .
## SDI.plot:Fire.actual.post1
## SDI.plot:Fire.actual.post2
## Thin.actual:Fire.actual.post1    **
## Thin.actual:Fire.actual.post2
## Fire.actual.post1:Fire.actual.post2
## ---
## Signif. codes:  0 '***' 0.001 '**' 0.01 '*' 0.05 '.' 0.1 ' ' 1
```

iteration limit reached

## Pre to Late Colonization

```
## Warning in anova.negbin(post2.CONIF.col.res <- glm.nb(Colonization ~ (SDI.plot
## + : tests made without re-estimating 'theta'

## Analysis of Deviance Table
##
## Model: Negative Binomial(5.0473), link: log
##
## Response: Colonization
##
## Terms added sequentially (first to last)
##
##
##              Df Deviance Resid. Df Resid. Dev  Pr(>Chi)
```

```
## NULL 71 139.208
## SDI.plot 1 2.9664 70 136.242 0.0850106
## Thin.actual 1 4.8659 69 131.376 0.0273931
## Fire.actual.post1 1 12.0266 68 119.349 0.0005245
## Fire.actual.post2 1 30.7277 67 88.622 2.969e-08
## SDI.plot:Thin.actual 1 2.5426 66 86.079 0.1108128
## SDI.plot:Fire.actual.post1 1 1.4854 65 84.594 0.2229266
## SDI.plot:Fire.actual.post2 1 0.0048 64 84.589 0.9447450
## Thin.actual:Fire.actual.post1 1 0.7808 63 83.808 0.3768823
## Thin.actual:Fire.actual.post2 1 3.9740 62 79.834 0.0462090
## Fire.actual.post1:Fire.actual.post2 1 8.3489 61 71.485 0.0038591
##
## NULL
## SDI.plot .
## Thin.actual *
## Fire.actual.post1 ***
## Fire.actual.post2 ***
## SDI.plot:Thin.actual
## SDI.plot:Fire.actual.post1
## SDI.plot:Fire.actual.post2
## Thin.actual:Fire.actual.post1
## Thin.actual:Fire.actual.post2 *
## Fire.actual.post1:Fire.actual.post2 **
## ---
## Signif. codes:  0 '***' 0.001 '**' 0.01 '*' 0.05 '.' 0.1 ' ' 1
```

Thin, Fire.actual.post1, Fire.actual.post2, Thin:Fire.actual.post2, Fire.actual.post1:Fire.actual.post2; (SDI marginal)

Persistence

```
## Warning in sqrt(1/i): NaNs produced
```

```
## Warning in sqrt(1/i): NaNs produced
```

```
## Warning in anova.negbin(post2.CONIF.per.res <- glm.nb(Persistence ~ (SDI.plot
## + : tests made without re-estimating 'theta')
```

```
## Analysis of Deviance Table
```

```
##
```

```
## Model: Negative Binomial(2.311805e+15), link: log
```

```
##
```

```
## Response: Persistence
```

```
##
```

```
## Terms added sequentially (first to last)
```

```
##
```

```
##
```

|                         | Df | Deviance | Resid. Df | Resid. Dev | Pr(>Chi)  |
|-------------------------|----|----------|-----------|------------|-----------|
| ## NULL                 |    |          | 31        | 30.462     |           |
| ## SDI.plot             | 1  | 3.1486   | 30        | 27.314     | 0.07599 . |
| ## Thin.actual          | 1  | 4.4919   | 29        | 22.822     | 0.03406 * |
| ## Fire.actual.post1    | 1  | 0.1962   | 28        | 22.625     | 0.65780   |
| ## Fire.actual.post2    | 1  | 2.1806   | 27        | 20.445     | 0.13976   |
| ## SDI.plot:Thin.actual | 1  | 0.0000   | 26        | 21.364     | 1.00000   |

```
## SDI.plot:Fire.actual.post1      1  0.0000      25    21.684  1.00000
## SDI.plot:Fire.actual.post2      1  1.6435      24    20.040  0.19984
## Thin.actual:Fire.actual.post1   1  0.0000      23    22.623  1.00000
## Thin.actual:Fire.actual.post2   1  2.3224      22    20.301  0.12752
## Fire.actual.post1:Fire.actual.post2 1  0.0000      21    21.055  1.00000
## ---
## Signif. codes:  0 '***' 0.001 '**' 0.01 '*' 0.05 '.' 0.1 ' ' 1
```

NaNs produced

graphs of colonization/persistence

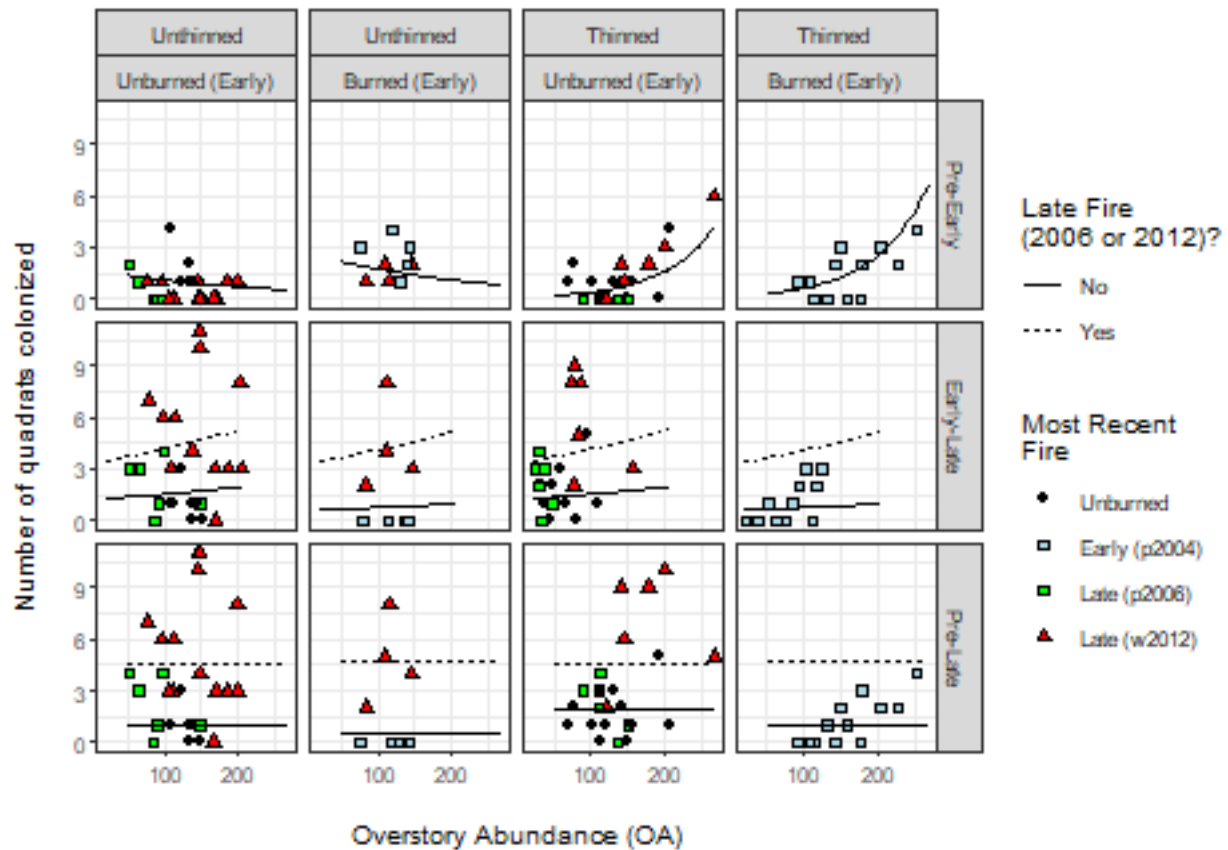

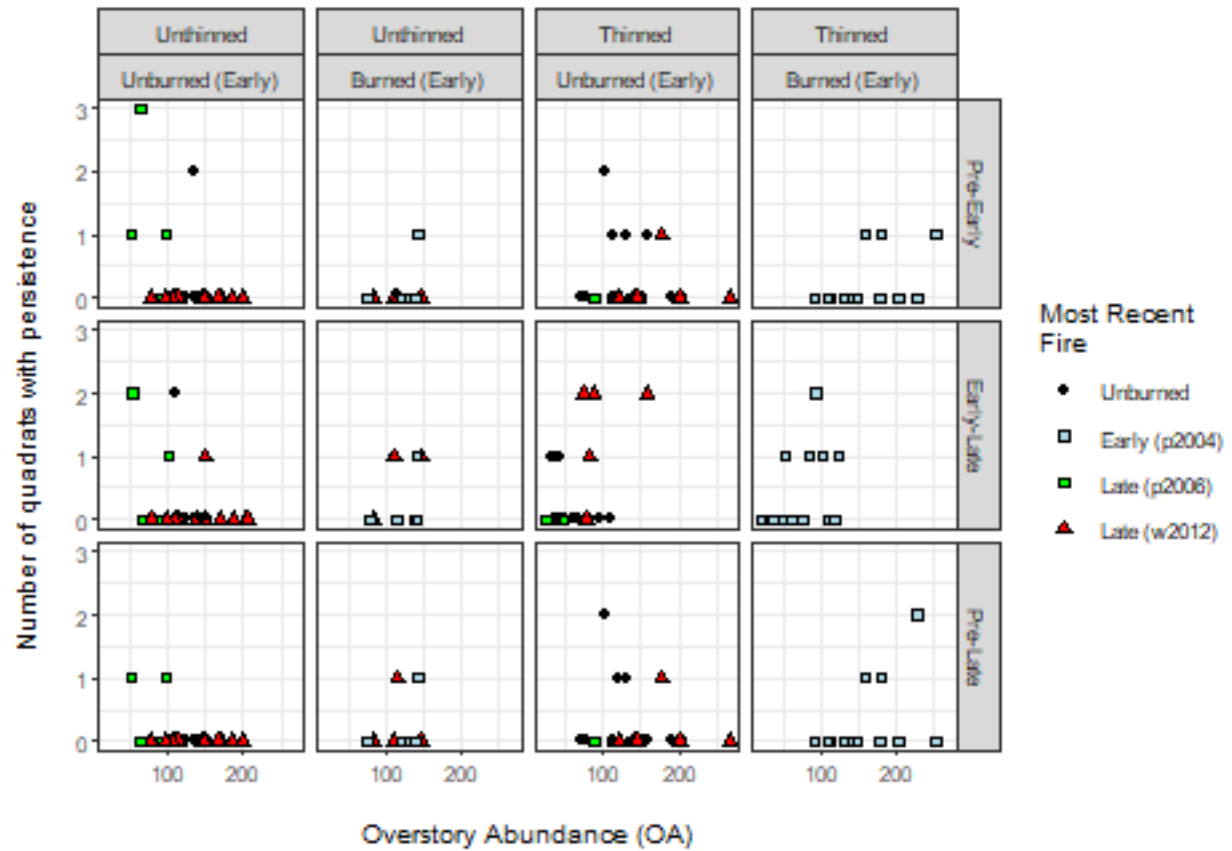

## Seedling Dynamics (graphics)

Pre to Early

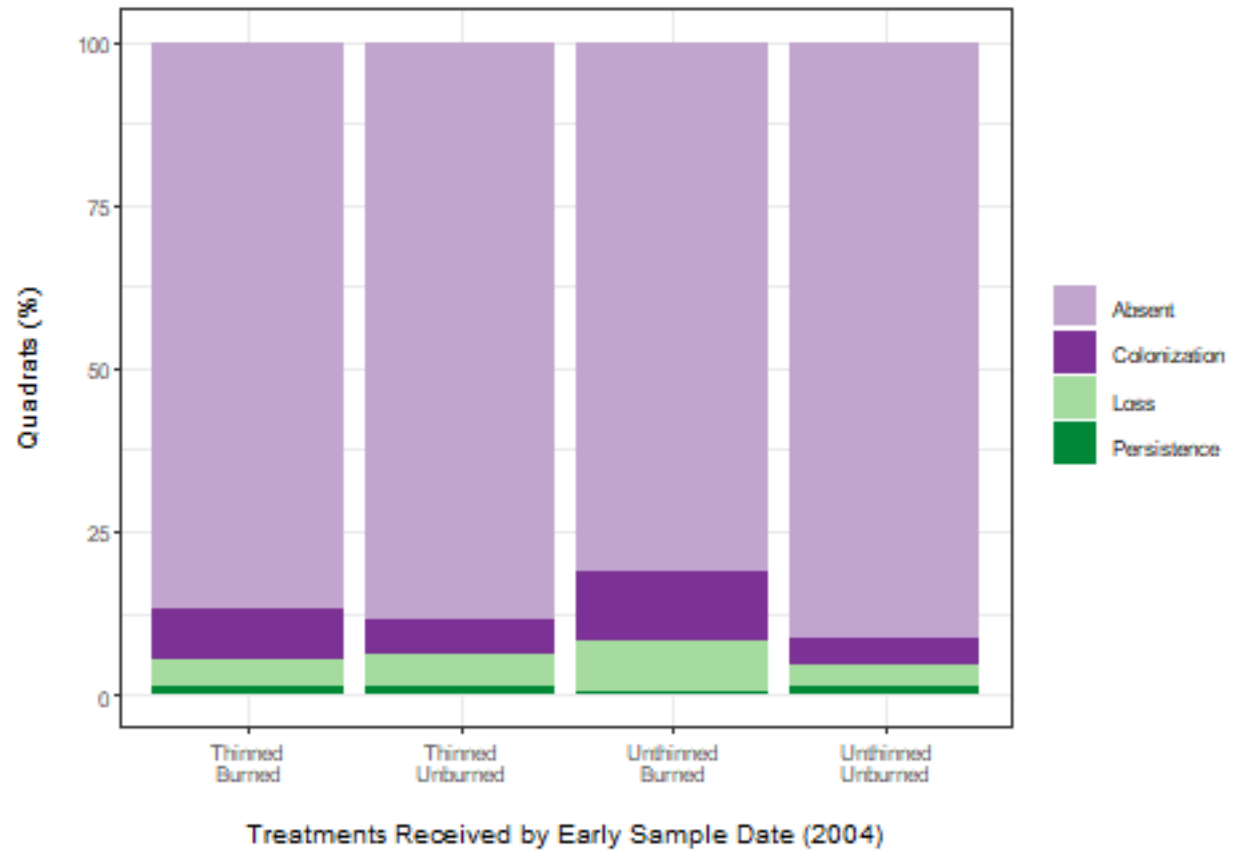

Early to Late and Pre to Late

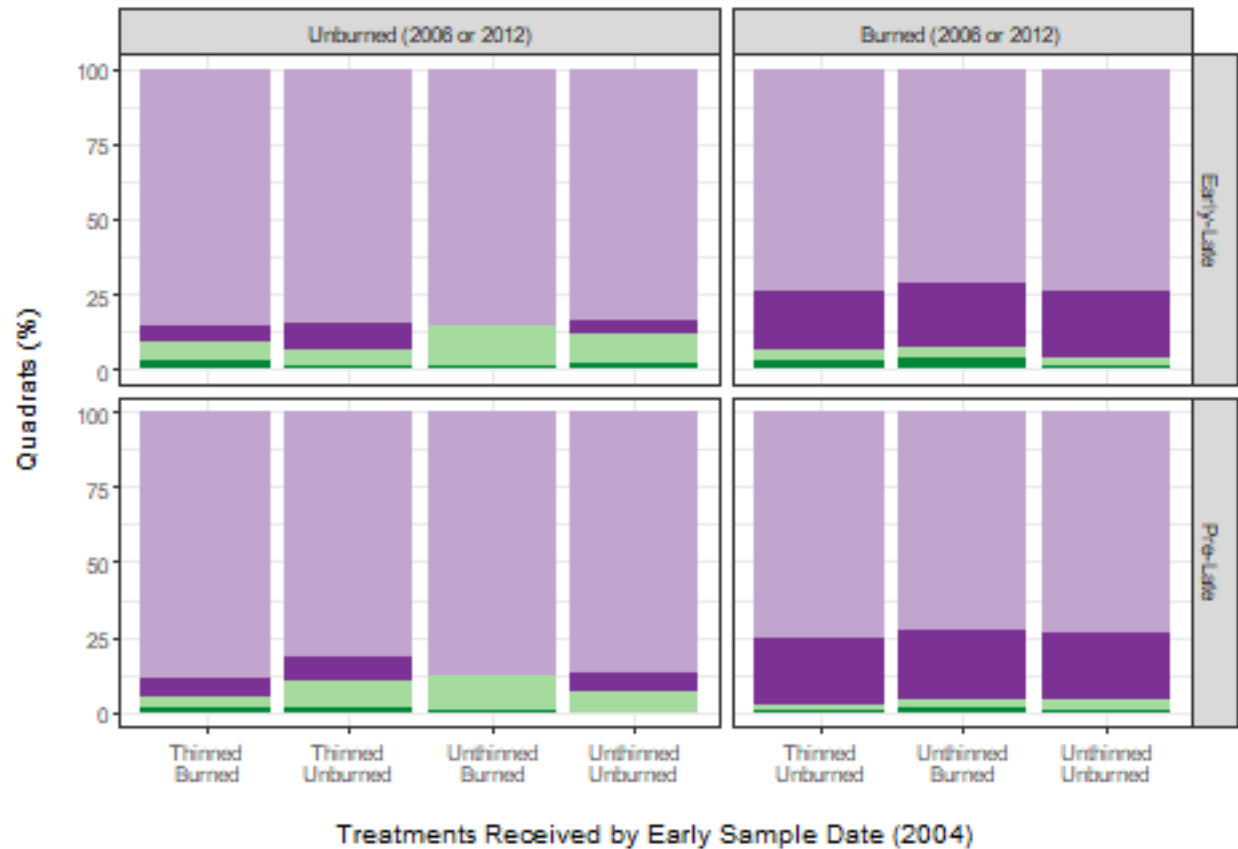

## PCA of Environment and Pretreatment Variables

## Importance of components:

|                           | Comp.1    | Comp.2    | Comp.3    | Comp.4     | Comp.5    |
|---------------------------|-----------|-----------|-----------|------------|-----------|
| ## Standard deviation     | 1.7297825 | 1.1196291 | 0.9412592 | 0.68865336 | 0.6259934 |
| ## Proportion of Variance | 0.4986913 | 0.2089282 | 0.1476615 | 0.07904057 | 0.0653113 |
| ## Cumulative Proportion  | 0.4986913 | 0.7076195 | 0.8552810 | 0.93432153 | 0.9996328 |

  

|                           | Comp.6       |
|---------------------------|--------------|
| ## Standard deviation     | 0.0469367070 |
| ## Proportion of Variance | 0.0003671757 |
| ## Cumulative Proportion  | 1.0000000000 |

|                  | Comp.1     | Comp.2      | Comp.3       | Comp.4      | Comp.5      |
|------------------|------------|-------------|--------------|-------------|-------------|
| ## Herb_pre      | 0.3117990  | 0.57876907  | 0.222583544  | 0.71608794  | 0.07350663  |
| ## Shrub_pre     | 0.0923071  | -0.73685884 | 0.455199197  | 0.43694388  | -0.22447061 |
| ## aHLI          | 0.3542812  | 0.24571311  | 0.648375824  | -0.51787874 | -0.35401192 |
| ## BA.plot_pre   | -0.4377695 | 0.03274241  | 0.531134195  | -0.06566794 | 0.66458971  |
| ## dens.plot_pre | -0.5208934 | 0.19245472  | -0.005713224 | 0.13974096  | -0.57968229 |
| ## OA.plot_pre   | -0.5529679 | 0.15355651  | 0.201799095  | 0.06526797  | -0.20291437 |

One PC explains half of variation in environmental and initial conditions; two explain 71%.

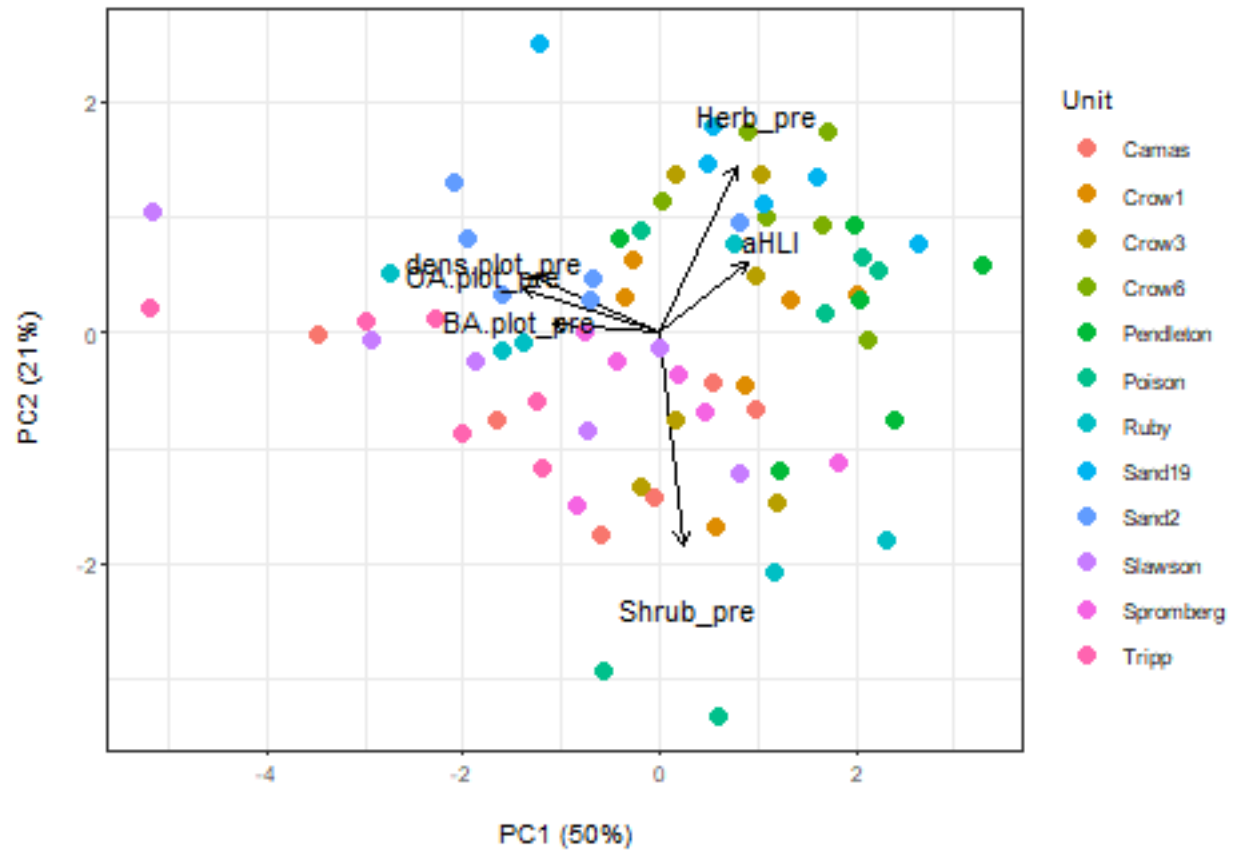

First PC associated with overstory abundance and aHLI.
